# Supplementary material
Source: Research Square preprint supplement (doi:10.21203/rs.3.rs-9906403/v1)
Supplement: Supplementary file 1 [file b19e700f5a93e84892a10a9b.pdf]

### **Supplementary Questionnaire (English Translation)**

**This appendix reproduces the original survey items administered to undergraduate medical students during the 2024–2025 physician workforce crisis. To calibrate distress, two widely recognised national anchors were included: the COVID-19 peak (a prolonged public-health emergency) and the 29 October 2022 Itaewon crowd crush (an acute mass-casualty crowd disaster in a narrow nightlife district of Seoul).**

#### **Demographics**

**Age (years)**

**Write-in: \_\_\_\_\_ years**

**Sex**

- Male**
- Female**
- Other**
- Prefer not to say**

**If a student, how many years since admission? (2025 entrants = admitted this year)**

- 2025 entrants**
- 1-year**
- 2-year**
- 3-year**

#### **Exposure & educational disruption**

**Have you personally experienced the recent medical crisis (residents' and professors' collective actions, etc.)?**

- Yes**
- No**
- Don't know**

**During the medical crisis, how was your class/practice affected?**

- Completely disrupted**
- Partially disrupted**
- Not affected**

#### **Motivation & career impact**

**Has your current academic motivation decreased due to the medical crisis?**

- Yes**
- No**
- Don't know**

**Did the medical crisis affect your specialty/career decision?**

- Yes
- No
- Don't know

**Has the medical crisis changed your values about being a physician?**

- Yes
- No
- Don't know

**Stress & comparative distress (incl. SUDS)**

**In the past month (due to the crisis), did you feel stress/anxiety/helplessness?**

- Yes
- No

**In the past month, did intrusive upsetting memories recur?**

- Yes
- No

**Did you avoid recalling or talking about the event?**

- Yes
- No

**Compared with before, did you have difficulty initiating/maintaining sleep?**

- Yes
- No

**Compared with before, did you have difficulty concentrating?**

- Yes
- No

**Compared with before, did you experience hyperarousal/startle or irritability?**

- Yes
- No

**Did prolonged negative emotions (helplessness/anger/fear) persist?**

- Yes
- No

**Did you feel apathy/anhedonia (loss of interest/drive)?**

- Yes
- No

**Did you experience functional impairment in study/clinical/social/daily life?**

- Yes
- No

**Psychological impact versus the COVID-19 peak**

- More severe**
- Similar**
- Less severe**
- Not applicable**

**Psychological impact versus the 2022 Itaewon crowd crush**

- More severe**
- Similar**
- Less severe**
- Not applicable**

**Peak distress during the COVID-19 peak (SUDS 0–100)**

**Write-in: \_\_\_\_\_ (0–100)**

**Peak distress during the 2022 Itaewon incident (SUDS 0–100)**

**Write-in: \_\_\_\_\_ (0–100)**

**Current/peak distress during the medical crisis (SUDS 0–100)**

**Write-in: \_\_\_\_\_ (0–100)**

**Media & government**

**Have you perceived distortion or bias in media coverage?**

- Yes**
- No**
- Don't know**

**Do you think the government's response was appropriate?**

- Yes**
- No**
- Don't know**

**Essential medical care**

**Since the medical crisis, has your perception of essential medical care changed?**

- Yes**
- No**
- Don't know**

**Do you agree that essential medical fields need strengthening/support?**

- Yes**
- No**
- Don't know**

**Have you considered entering an essential medical field?**

- Yes**
- No**

- Don't know

**Professional identity & trust**

**Since the crisis, have the social meanings of being a 'doctor' changed?**

- Changed positively
- Changed negatively
- Don't know

**Since the crisis, do you feel your identity as a doctor has strengthened?**

- Yes
- No
- Don't know

**Since the crisis, how has trust in senior doctors (professors/residents) changed?**

- Strengthened
- Weakened
- No change
- Don't know

**Have seniors' actions/choices influenced your career decision?**

- Yes
- No
- Don't know

**How has your trust in the medical community as a whole changed?**

- Strengthened
- Weakened
- No change
- Don't know

**Outlook & behavioural intention**

**How do you view the future of Korean healthcare?**

- Very pessimistic
- Pessimistic
- Neutral
- Optimistic
- Very optimistic
- Don't know

**Do you believe the healthcare system will improve?**

- Yes
- No
- Don't know

**If a similar crisis occurs, would you make the same choice (action/participation)?**

- Yes**
- No**
- Not a med student then, but would participate**
- Not a med student then, would not participate**
- Don't know**

**Overseas career intentions**

**Do you intend to practise abroad?**

- Yes**
- No**
- Don't know**

**If considering going abroad, when would you prefer to go?**

- After medical school**
- After board certification**
- After research opportunity**
- Don't know**
- No plan**

**What are your reasons for considering work abroad? (multi-select)**

- Work environment**
- Compensation**
- Policy uncertainty**
- Unfair national policy**
- Lower trust in government**
- Research/academic opportunities**
- Personal reasons**

**Military service intentions**

**Preferred type of military service (male students only)**

- Military physician**
- Public health doctor**
- General military service**
- Don't know**

**Did the crisis influence your military-service career decision?**

- Yes**
- No**
- Don't know**

**If changed, what were the reasons? (multi-select)**

- Workload**
- Compensation**
- Policy uncertainty**
- Unfair national policy**
- Lower trust in government**

**After the crisis, does military service feel like a heavier burden?**

- Yes**
- No**
- Don't know**

**Open-ended reflection**

**As a student, what was the most difficult aspect during the crisis? (open-ended)**

**Write-in:** \_\_\_\_\_
